# Supplementary material for: Efficient oligonucleotide probe selection for pan-genomic tiling arrays
Source: Springer Nature journal article supplement (doi:10.1186/1471-2105-10-293), 2009-09-16

### a. Tiling Density

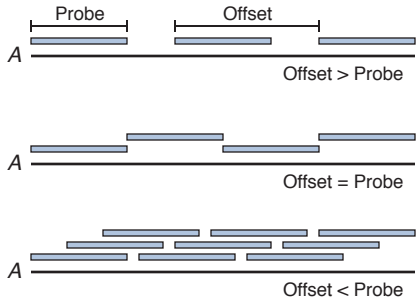

### b. Pan-genome Tiling

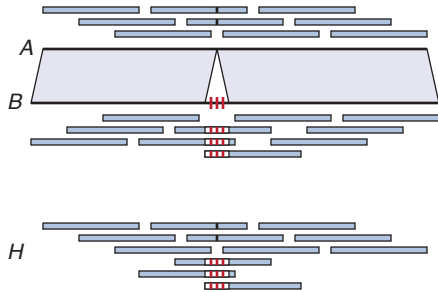

Supplement: 12859_2009_3023_MOESM1_ESM.pdf [file 12859_2009_3023_MOESM1_ESM.pdf]
