# Supplementary material for: Efficient oligonucleotide probe selection for pan-genomic tiling arrays
Source: Springer Nature journal article supplement (doi:10.1186/1471-2105-10-293), 2009-09-16

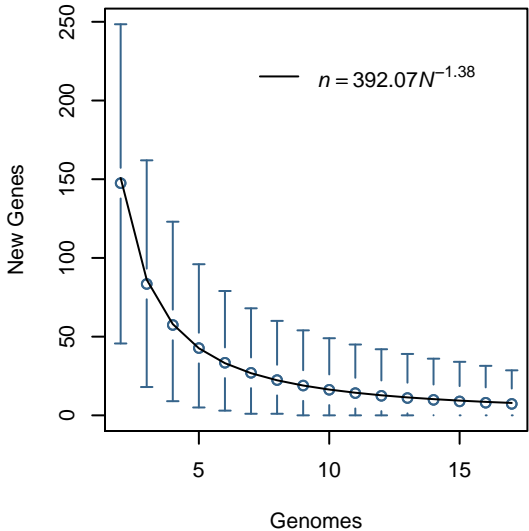

Supplement: 12859_2009_3023_MOESM2_ESM.pdf [file 12859_2009_3023_MOESM2_ESM.pdf]
